# Supplementary material for: Slow and fast absorption saturation of black phosphorus: experiment and modelling
Source: Royal Society of Chemistry journal article supplement (doi:10.1039/c6nr06076e), 2016-01-01
Supplement: c6nr06076e1.pdf [file c6nr06076e1.pdf]

## Supplementary Information

### Slow and fast absorption saturation of black phosphorus: experiment and modelling

Saifeng Zhang,<sup>1</sup> Yuanxin Li,<sup>1</sup> Xiaoyan Zhang,<sup>1</sup> Ningning Dong,<sup>1</sup> Kangpeng Wang,<sup>2,3</sup> Damien Hanlon,<sup>2,3</sup> Jonathan N. Coleman,<sup>2,3</sup> Long Zhang,<sup>1</sup> Jun Wang<sup>1,\*</sup>

<sup>1</sup>Key Laboratory of Materials for High-Power Laser, Shanghai Institute of Optics and Fine Mechanics, Chinese Academy of Sciences, Shanghai 201800, China

<sup>2</sup>School of Physics, Trinity College Dublin, Dublin 2, Ireland

<sup>3</sup>CRANN and AMBER Research Centres, Trinity College Dublin, Dublin 2, Ireland

\*jwang@siom.ac.cn

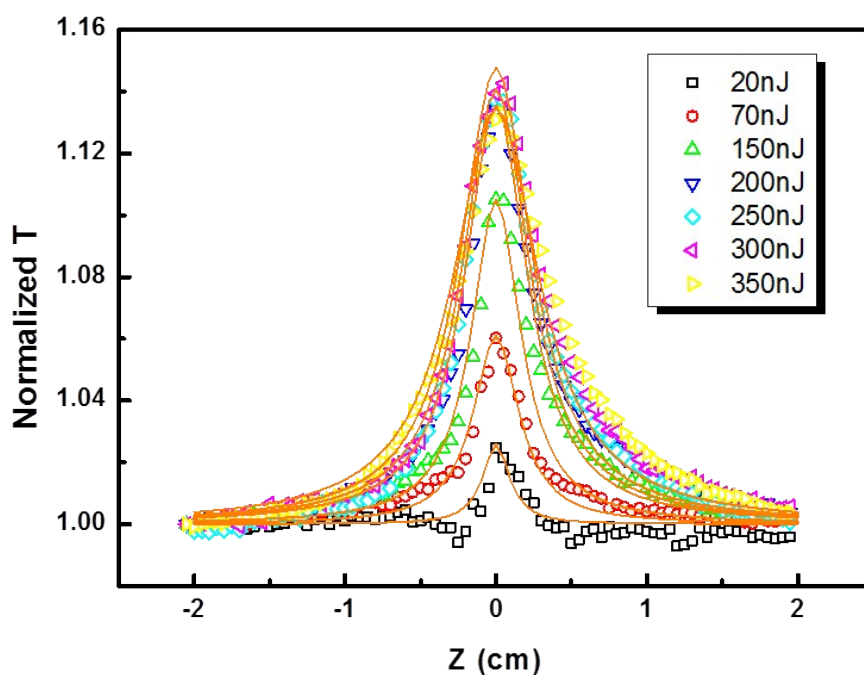

Figure S1 The Z-scan data of BP at 515 nm. The orange lines are the fitting results.

The Z-scan data of BP was fitted according to the propagating equation:

$$dI/dz = -(\alpha_0 + \beta I)I,$$

where  $\alpha_0$  is the linear absorption coefficient,  $\beta$  is the nonlinear absorption coefficient.

Table S1 The parameters used in the fitting of Z-scan data of BP at 515 nm

| BP 515 nm |  |  |  |  |  |
|-----------|--|--|--|--|--|
|           |  |  |  |  |  |

|                   |                 |            |                              |                                                 |                                  |
|-------------------|-----------------|------------|------------------------------|-------------------------------------------------|----------------------------------|
| $T_0=0.799$       |                 |            |                              |                                                 |                                  |
| Pulse energy (nJ) | $\beta$ (cm/GW) | $Z_0$ (cm) | $\omega_0$ ( $\mu\text{m}$ ) | $\text{Im}\chi^{(3)}$ (esu, $\times 10^{-14}$ ) | FOM (esu cm, $\times 10^{-15}$ ) |
| 20                | 0.027           | 0.11       | 13.4284                      | 0.989292                                        | 4.40872                          |
| 70                | 0.0305          | 0.19       | 17.6484                      | 1.11753                                         | 4.98022                          |
| 150               | 0.026           | 0.21       | 18.554                       | 0.952652                                        | 4.24543                          |
| 200               | 0.0315          | 0.27       | 21.0383                      | 1.15417                                         | 5.1435                           |
| 250               | 0.028           | 0.29       | 21.8036                      | 1.02593                                         | 4.572                            |
| 300               | 0.026           | 0.31       | 22.5429                      | 0.952652                                        | 4.24543                          |
| 350               | 0.0245          | 0.37       | 24.628                       | 0.897691                                        | 4.0005                           |

It was found that the Z-scan curves cannot be fitted well with a constant nonlinear absorption coefficient and a fixed beam radius. Actually, at 515 nm, the beam radius in our experiment is about 16  $\mu\text{m}$ .

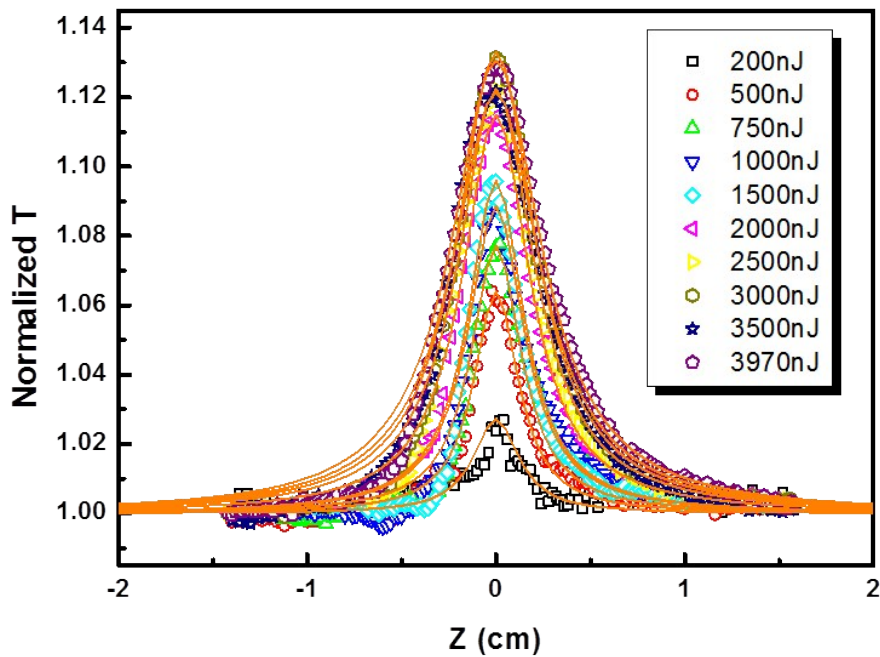

Figure S2 The Z-scan data of BP at 1030 nm. The orange lines are the fitting results.

Table S2 The parameters used in the fitting of Z-scan data of BP at 1030 nm

|                           |                 |            |                              |                                                 |                                  |
|---------------------------|-----------------|------------|------------------------------|-------------------------------------------------|----------------------------------|
| BP 1030 nm<br>$T_0=0.812$ |                 |            |                              |                                                 |                                  |
| Pulse energy (nJ)         | $\beta$ (cm/GW) | $Z_0$ (cm) | $\omega_0$ ( $\mu\text{m}$ ) | $\text{Im}\chi^{(3)}$ (esu, $\times 10^{-14}$ ) | FOM (esu cm, $\times 10^{-15}$ ) |
| 200                       | 0.0077          | 0.15       | 22.1763                      | 0.564263                                        | 2.70948                          |
| 500                       | 0.007           | 0.15       | 22.1763                      | 0.512966                                        | 2.46316                          |
| 750                       | 0.0063          | 0.17       | 23.6085                      | 0.46167                                         | 2.21685                          |

|      |        |      |         |          |         |
|------|--------|------|---------|----------|---------|
| 1000 | 0.006  | 0.19 | 24.9586 | 0.439685 | 2.11128 |
| 1500 | 0.0043 | 0.19 | 24.9586 | 0.315108 | 1.51309 |
| 2000 | 0.0046 | 0.23 | 27.4604 | 0.337092 | 1.61865 |
| 2500 | 0.0044 | 0.26 | 29.1965 | 0.322436 | 1.54827 |
| 3000 | 0.0041 | 0.27 | 29.7526 | 0.300452 | 1.44271 |
| 3500 | 0.0036 | 0.3  | 31.362  | 0.263811 | 1.26677 |
| 3970 | 0.0035 | 0.31 | 31.8805 | 0.256483 | 1.23158 |

It was found that the Z-scan curves cannot be fitted well with a constant nonlinear absorption coefficient and a fixed beam radius. At 1030 nm, the beam radius in our experiment is about 32  $\mu\text{m}$ .
